# Supplementary material for: Thermal-bias PCR: generation of amplicon libraries without degenerate primer interference
Source: PeerJ. 2025 Oct 24;13:e20241. doi: 10.7717/peerj.20241 (PMC12558157; doi:10.7717/peerj.20241)
Supplement: Supplemental Information 2 — Oligonucleotide primer sequences and calculated Tms. [file peerj-13-20241-s002.xlsx]

## Sheet: Sheet1
Data SD1: Primers and calculated Tms
	Degenerate primers Tms calculated using appropriate A or T in variable positions for lower values, G or C for higher values
	ND = Non-degenerate
					Tm Calculations
						50 mM Na+, 300 nM oligo	50 mM Na+, 500 nM oligo	Q5 Ultra II, 500 nM oligo
	Source	V3-V4 region	Sequence (5'-3')	# sequences	ApE (1)	Biotools Nearest Neighbor (2)	ThermoFisher (3)	NEB Tm Calc (4)	NEB Q5 Recommend Anneal
					Tm (°C)
	Klindworth, et al., 2012	S-D-Bact-0341-b-S-17	CCTACGGGNGGCWGCAG	8	58-62	49-54	60-64	68-72	58
		S-D-Bact-0785-a-A-21	GACTACHVGGGTATCTAATCC	9	50-55	44-50	54-60	57-63
	Takahashi, et al., 2014	Pro_341F	CCTACGGGNBGCASCAG	24	56-62	45-56	58-64	65-72	58
		Pro_805R	GACTACNVGGGTATCTAATCC	12	50-55	45-52	54-60	57-64
	This study	ND_F1	CCTACGGGAGGCAGCAG	1	58	57	60	68	61
	(non-degenerate versions)	ND_R1	GACTACCAGGGTATCTAATCC	1	52	51	56	60
		ND_R2_Tm57	GTGGACTACCAGGGTATCTAATCC	1	57
		ND_F2_Tm54	TACGGGAGGCAGCAG	1	54
		V4-V5 region
	Parada, et al., 2016	515F-Y	GTGYCAGCMGCCGCGGTAA	4	61-67	62-66	62-67	72-78	56
	Quince et al., 2011	926R	CCGYCAATTYMTTTRAGTTT	16	45-55	48-56	48-56	54-64
	This study	ND_V4_F	GTGCCAGCAGCCGCGGTAA	1	64	64	65	75	61
	This study	ND_V5_R	CCGTCAATTCATTTGAGTTT	1	50	52	51	59
		V4 region
	Apprill et al., 2015	806RB	GGACTACNVGGGTWTCTAAT	24	48-54	54-58	48-55	57-63	60
	This study	ND_V4_R	GGACTACCAGGGTATCTAAT	1	51	56	51.8	60	62
		Thermal-bias V3-V4 region
	This Study	TB_F_Tm55_v1	ACCGATGTCCGTCGTCGGCAGCGTCAGATGTGTATAAGAGACAGCTACGGGAGGCAGCAG	1	55 (target), 79 (entire)	54 (target), 80 (entire)	57 (target), 79 (entire)	66 (target), 87 (entire)
	Nextera set		Illumina Nextera adapter
		TB_R_Tm55_v1	CGCGCTGCGTCGGTCTCGTGGGCTCGGAGATGTGTATAAGAGACAGGGACTACCAGGGTATCTAATCC	1	55 (target), 78 (entire)	53 (target), 79 (entire)	59 (target), 79 (entire)	64 (target), 87 (entire)
			Illumina Nextera adapter
	TruSeq set	TB_F_Tm55_v2	CGGAGCGACCGATGTCCGACACTCTTTCCCTACACGACGCTCTTCCGATCTCTACGGGAGGCAGCAG	1	55 (target), 80 (entire)	54 (target), 81 (entire)	57 (target), 86 (entire)	66 (target), 89 (entire)
			Illumina TruSeq adapter
		TB_R_Tm55_v2	GCCGACGCGCTGCGTCGGACTGGAGTTCAGACGTGTGCTCTTCCGATCTGGACTACCAGGGTATCTAATCC	1	55 (target), 80 (entire)	53 (target), 81 (entire)	59 (target), 86 (entire)	64 (target), 89 (entire)
			Illumina TruSeq adapter
	Tm calculators	1) ApE - A Plasmid Editor software by M. Wayne Davis : https://jorgensen.biology.utah.edu/wayned/ape/
		2) BioTools Oligonucleotide Properties Calculator : http://biotools.nubic.northwestern.edu/OligoCalc2.0.html
		3) ThermoFisher Scientific Tm Calculator : https://www.thermofisher.com/us/en/home/brands/thermo-scientific/molecular-biology/molecular-biology-learning-center/molecular-biology-resource-library/thermo-scientific-web-tools/tm-calculator.html
		4) New Engalnd Biolabs Tm Calculator : https://tmcalculator.neb.com/#!/main
