# Supplementary material for: Thermal-bias PCR: generation of amplicon libraries without degenerate primer interference
Source: PeerJ. 2025 Oct 24;13:e20241. doi: 10.7717/peerj.20241 (PMC12558157; doi:10.7717/peerj.20241)
Supplement: Supplemental Information 9 — Index, raw fluorescence data, and global fitting analyses. [file peerj-13-20241-s009.xlsx]

## Sheet: Raw Data Index
	Supporting Data SD3: PCR modeler and raw data
	Sheet Name	Contents
	PCR Modeler	Worksheet that generates modeled PCR data using the PCR equation
	Fig_1 FL data	Fluorescence qPCR data for V3-V4, V4-V5, and V4 amplifications
	Fig_1 global fitting data	Global fitting results
	Fig_2 FL data	Fluorescence qPCR data for V3-V4 amplification from different templates
	Fig_2 global fitting data	Global fitting results
	Fig_3 FL data	Fluorescence qPCR data of thermal-bias PCR using Match, Mismatch, and mixed templates
	Fig_3 global fitting data	Global fitting results
	Fig_4 FL data	Fluorescence data of mixed genome thermal-bias libraries
	Fig_4 global fitting data	Global fitting results

## Sheet: PCR Modeler
	Supporting Data SD3: PCR Modeler. Changing indicated values generates modeled amplicon yield per cycle.
Cycle	Yield		Starting Template			Maximum Yield (max)			Inhibition Constant (KD)		Maximum Per-cycle Efficiency		final yield			cycle 30 value
1	0.2		0.1			10000			1000		1		2701.56			2701.3
2	0.399956
3	0.799736		max/KD:	10							Value referenced into model
4	1.59877										1
5	3.19473
6	6.37827
7	12.712
8	25.2484
9	49.8112
10	97.0108
11	184.502
12	336.861
13	577.492
14	910.225
15	1303.88
16	1699.81
17	2040.48
18	2295.23
19	2464.95
20	2568.75
21	2628.69
22	2662.11
23	2680.36
24	2690.21
25	2695.5
26	2698.33
27	2699.84
28	2700.64
29	2701.07
30	2701.3
31	2701.42
32	2701.49
33	2701.52
34	2701.54
35	2701.55
36	2701.56
37	2701.56
38	2701.56
39	2701.56
40	2701.56

## Sheet: Fig_1 FL data
	Fig 1 : qPCR FL data
Cycle	B3	B4	B5	B6	B7	B8	B9	B10	C3	C4	C5	C6	C7	C8	C9	C10	D3	D4	D5	D6	D7	D8	D9	D10
1	83.5458	92.0152	84.5469	78.4546	107.827	100.053	106.558	105.684	108.497	110.755	110.885	107.182	167.495	172.299	177.719	170.35	55.0716	75.3023	69.1612	68.731	134.459	127.882	137.105	142.509
2	66.02	67.279	70.6098	63.4149	75.7017	75.1209	76.2475	77.9028	80.3749	86.3044	85.036	84.5703	131.354	133.906	130.662	132.36	37.2676	61.851	58.9464	46.3751	102.015	101.687	107.431	102.031
3	49.9961	51.0516	53.4154	46.8	52.7559	56.2644	51.6311	54.5547	61.1288	63.921	64.8813	61.1455	95.9115	90.519	92.6937	93.2687	30.0105	49.5448	47.4984	42.6135	74.6465	73.9149	80.4152	77.7947
4	37.9678	38.0704	39.2175	42.4781	38.2757	37.4856	37.1382	36.4773	40.6856	38.906	45.0021	43.794	56.1548	58.4779	60.6921	58.5931	21.0175	32.3079	33.8917	32.67	50.5913	51.0732	53.5674	54.004
5	24.9146	28.2579	22.5863	25.0866	12.7516	11.884	21.2641	16.9659	19.7566	24.2396	18.4038	23.1558	23.5386	22.7157	22.7221	24.6408	11.3271	21.8152	21.5741	23.648	24.0501	28.2044	22.8288	27.4775
6	12.9383	11.1608	14.4356	10.3244	-3.85934	2.0855	2.93203	0.966095	6.36015	-0.22285	6.96517	4.58231	-9.89372	-5.43448	-2.98091	-10.2446	3.70124	8.75827	8.37602	12.7192	6.41023	8.12259	4.68577	3.98877
7	3.23671	1.2425	5.43024	-0.401701	-9.35973	-12.539	-19.5958	-13.6277	-16.9757	-7.11957	-10.7583	-9.50935	-27.9562	-28.8376	-36.3111	-30.8124	-0.0213528	4.5501	2.8557	0.067063	-14.0822	-14.7198	-20.242	-14.0708
8	-4.85857	-5.96627	-6.61066	-4.61909	-21.1045	-25.715	-18.9932	-22.4742	-15.7104	-24.5865	-22.4188	-22.8631	-47.8051	-39.9604	-41.2789	-47.2378	-5.27938	-9.09778	-5.55614	-11.8872	-28.8943	-34.5508	-30.2452	-39.5044
9	-16.0984	-15.6219	-13.9457	-12.5434	-15.8754	-17.8286	-23.5734	-24.4055	-29.5665	-29.5902	-37.5256	-32.1535	-46.6711	-46.1126	-50.0602	-52.697	-7.72517	-16.6588	-16.3361	-16.5316	-43.3785	-45.7832	-45.1018	-45.2694
10	-20.3822	-14.2717	-16.3116	-21.3762	-11.8163	-9.70607	-15.6351	-13.4123	-32.1279	-27.2821	-31.3451	-31.2423	-34.2812	-32.8451	-33.7815	-33.2675	-11.512	-20.2617	-24.9452	-21.5566	-41.8215	-42.3294	-40.4987	-45.1576
11	-27.1514	-25.0576	-27.381	-25.0277	16.9355	16.3769	18.1643	21.6291	-17.597	-24.1989	-19.235	-18.0505	28.3733	23.6266	20.8122	28.6436	-4.62266	-25.1138	-24.0228	-25.5564	-24.5391	-25.3984	-26.8751	-21.6422
12	-25.019	-25.3641	-21.8564	-22.3949	88.3129	92.7788	95.6563	92.4202	21.0341	24.206	23.6815	23.5684	164.106	163.288	171.347	164.71	-5.67545	-24.6407	-19.7206	-25.7571	26.928	28.4662	26.56	25.4879
13	-20.7432	-24.2896	-21.9209	-18.9738	222.789	234.04	232.8	229.478	117.176	120.062	125.199	120.908	463.784	456.085	466.066	456.939	12.2456	-10.112	-8.76656	-2.13233	147.883	150.556	154.889	155.978
14	-4.18871	0.516063	0.773657	-3.98222	480.343	501.681	492.892	490.036	312.69	325.008	325.011	325.523	1046.05	1040.42	1059.88	1034.23	55.147	24.3995	22.1196	27.6706	387.499	393.45	405.914	404.654
15	36.3253	35.4614	36.9086	37.216	942.829	982.444	972.077	953.5	698.068	715.584	723.707	729.771	2180.01	2161.05	2202.06	2141.52	124.228	105.868	103.775	93.3575	855.531	881.549	888.378	896.538
16	106.012	106.089	105.517	101.001	1758.16	1829.29	1804.43	1773.94	1415.22	1466.38	1474.35	1489.69	4228.12	4211.39	4283.71	4168.14	268.95	256.597	251.733	242.731	1749.15	1794.67	1819.78	1822.89
17	220.023	228.679	226.284	215.353	3164.98	3291.54	3240.18	3183.49	2752.53	2844.14	2864.31	2894.33	7772.54	7747.26	7874.26	7650.77	542.117	550.011	540.877	524.915	3372.16	3452.38	3496.13	3516.13
18	423.111	426.83	434.302	402.048	5490.58	5708.34	5619.72	5522.84	5098.05	5265.49	5315.79	5361.9	13262.9	13228.1	13429.4	13067.6	1039.55	1090.48	1073.25	1042.25	6188.74	6339.81	6406.8	6453.1
19	750.925	768.285	779.893	723.722	9107.53	9467.17	9333.97	9168.37	8909.83	9179.67	9263.3	9351.31	20333.8	20263.4	20611.4	20072.7	1943.96	2069.77	2047.27	1989.5	10663.2	10892.1	11037.4	11091.4
20	1294.82	1320.47	1332.38	1243.96	14178.3	14731.3	14527.5	14285	14266.7	14655.5	14838.7	14945.3	26644.7	26565.4	27042.2	26335.1	3551.45	3818.69	3769.99	3654.66	16768.2	17058.9	17329.6	17414.3
21	2172.91	2206.89	2238.54	2089.98	20052.7	20817.9	20605.7	20292.3	20009.4	20527.1	20801.1	20936.9	31744.9	31645.3	32225.4	31391.5	6262.3	6768.11	6685.01	6490.67	22928.1	23242	23683.3	23783.5
22	3565.9	3624.82	3686.8	3425.24	25269.1	26233.3	26021.1	25657.8	25009.1	25641.8	26001.2	26155.6	35232.5	35100.2	35753.9	34844.3	10427.3	11298.9	11159.5	10817.5	28137.7	28448.6	29039.9	29152.2
23	5730.02	5825.6	5922.89	5510.49	29308.2	30444.4	30250.9	29852.2	28854.9	29564.9	30026.7	30158.9	37460.2	37306.7	38000.1	37047.5	15825.9	17156.2	16926.1	16403.8	31953.7	32245.4	32936.3	33055.3
24	8895.48	9053.2	9194.81	8586.07	32004.8	33264.4	33093.1	32694.4	31547.8	32291.2	32818.7	32943.7	38922.9	38756.8	39485.9	38491	20875.7	22627.5	22290	21596.5	34516.4	34778.5	35516.1	35660.6
25	13151.2	13378.2	13577	12759.9	33739.9	35071.6	34914.2	34515.8	33360.4	34146.8	34720.7	34831.1	39939.5	39769.5	40512.3	39490.7	25107.6	27206.2	26781.6	25942.2	36225.3	36470.5	37239.9	37374.5
26	17951.7	18303.8	18496.6	17603.7	34906.4	36275.1	36121.5	35751.4	34632.1	35438.2	36029.8	36167.6	40687.8	40506.8	41256.6	40217	28194.1	30542.3	30050.7	29112.2	37408.9	37661.4	38457.9	38573.6
27	22322.1	22803.4	22973.8	22074.8	35731.9	37134.5	36971.1	36613.9	35544.2	36369.1	36969.8	37128.8	41255.1	41074.5	41808.5	40767.3	30307	32831.2	32289.7	31285.5	38277.8	38531.4	39333.1	39452.7
28	25913	26513.2	26659.3	25817.4	36312.7	37762.9	37590.8	37222.3	36246.1	37063.7	37687.4	37865.5	41708.5	41518.9	42254.7	41194.7	31760.2	34406.5	33833.5	32796.9	38930.3	39206.6	40012.8	40124.4
29	28547.4	29237	29352.5	28605.8	36768.4	38246.3	38067.3	37660	36754.2	37603.1	38234.7	38420.8	42075.3	41875.4	42613.6	41531.1	32793.4	35521.8	34937.2	33880.1	39453.1	39709.3	40559.8	40634.8
30	30394.4	31135.7	31240.1	30558.6	37105.6	38614	38426.9	37969.8	37154.3	37996.9	38677.2	38852.5	42369.2	42148	42889.3	41794.7	33546.5	36345.1	35759.9	34676.3	39866.3	40106.8	41001.6	41030.9
31	31693.5	32463.9	32570	31920.1	37400.4	38902.4	38727.6	38245.5	37478.4	38321.3	39023.5	39192.1	42603.1	42380.6	43109.4	42015.9	34122.5	36984.3	36375	35295.4	40187.9	40430.4	41337.2	41355.2
32	32651.4	33425.5	33545.7	32893.2	37633.8	39131.8	38967.5	38504.1	37765	38597	39313.9	39464.5	42791.1	42579	43297.1	42199.6	34562.2	37479.4	36869.4	35769.3	40459	40719.1	41603	41623.9
33	33370.4	34144.1	34272.8	33623.6	37842.1	39343.6	39185.9	38706.3	37997.5	38834.2	39545.8	39705.1	42946.6	42754.8	43457	42349.7	34926.5	37871.4	37254.1	36167.7	40671.7	40947.5	41816.8	41839.9
34	33921.4	34710.1	34824	34187.4	38011.6	39514.5	39374	38884.5	38200.7	39030.5	39741.2	39901.1	43076.1	42888.6	43590.7	42457.9	35208.9	38182.7	37574.5	36481.6	40866.4	41117.7	41996.5	42014.9
35	34354.4	35164.7	35262.4	34638.2	38159.8	39682.1	39528.9	39004.2	38376.1	39187	39914.1	40084.5	43194.4	42993.8	43696.5	42551.9	35442.7	38450.4	37832.2	36756.1	41005.4	41249.8	42147.9	42149.4
36	34694.3	35531.4	35615.7	35002.4	38277.7	39809.8	39665	39138.2	38541.4	39341.9	40072.2	40232	43288.8	43071.4	43788.6	42628.2	35638	38679.1	38043.8	36984.7	41119	41356.7	42263.9	42251.2
37	34987.7	35827.2	35910.4	35290.5	38396.7	39938.1	39778.4	39238.2	38674.2	39469.2	40208.1	40369.9	43368.8	43138.3	43856	42688.8	35810.3	38873.1	38231.1	37186.1	41203.7	41441.4	42376.2	42368
38	35221.8	36070.7	36144.9	35523.2	38500.9	40001	39879	39324.2	38791.7	39597.1	40322.3	40476.1	43422	43173.4	43905	42730.9	35957.7	39034.5	38393	37362.9	41278.3	41512.3	42431	42431
39	35437.6	36283.4	36357.3	35723	38606.1	40079.5	39966	39404	38887.1	39697.4	40429.3	40583.9	43479.1	43214.1	43945	42770.1	36077.5	39170.9	38546.4	37520.6	41349	41547.9	42501.7	42468.9
40	35627.2	36467.7	36549.8	35914.5	38682	40167.9	40035.2	39496.9	38981.9	39779.8	40539.3	40679.4	43527.4	43256.5	43977.1	42811.3	36180.4	39288.6	38689.9	37663.2	41417.6	41551.9	42552.1	42436.6
	Pro_341F & Pro_805R				ND_F1 & ND_R1				515F-Y & 926R				ND_V4_F & ND_V5_R				515F-Y & 806RB				ND_V4_F & ND_V4_R
	V3-V4								V4-V5								V4
	Invitrogen Platinum II with EvaGreen, Ec genomic template
	Earth Microbiome Protocol

## Sheet: Fig_1 global fitting data
	Fig 1 global fitting data
		primers	replicate	seed	max	KD	max/Kd		average seed	stand. dev.	average max/Kd	stand. dev.
		Pro_341F & Pro_805R	1	0.00211955	176159	8817.66	19.978		0.00211203	7.52379e-05	19.9259	0.0497638
		(V3-V4)	2	0.00214527	180027	9048.08	19.8967
			3	0.00219327	180277	9077.68	19.8594
			4	0.00199004	177737	8900.35	19.9697
		ND_F1 & ND_R1	1	0.0565878	151981	12582.8	12.0785		0.0573968	0.000971467	12.095	0.0524808
			2	0.0588212	158250	13052.6	12.124
			3	0.0577609	157859	12983.1	12.1588
			4	0.0564175	155103	12905.2	12.0186
		515F-Y & 926R	1	0.053527	151970	12679.1	11.9859		0.0551481	0.00101575	11.9635	0.0516513
		(V4-V5)	2	0.0551431	154610	13018.9	11.8758
			3	0.0556639	158062	13190.8	11.9827
			4	0.0562585	158843	13226.5	12.0095
		ND_V4_F & ND_V5_R	1	0.168962	153528	16372.3	9.3773		0.168135	0.00184453	9.2152	0.116986
			2	0.168098	151985	16397.1	9.26902
			3	0.17025	153672	16811.6	9.14083
			4	0.165228	149226	16446.1	9.07364
		515F-Y & 806RB	1	0.00871845	141810	11743.6	12.0755		0.00912614	0.000264291	12.1695	0.144609
		(V4)	2	0.00940357	153787	12746.1	12.0654
			3	0.00930903	151606	12509.1	12.1197
			4	0.0090735	148944	11994.7	12.4175
		ND_V4_F & ND_V4_R	1	0.0656764	155684	14264.4	10.9142		0.067345	0.0010158	10.8016	0.128011
			2	0.0673772	156221	14381.7	10.8625
			3	0.0681211	159577	14713.8	10.8454
			4	0.0682051	157923	14920.6	10.5842

## Sheet: Fig_2 FL data
	Fig. 2 fluorescence data
Cycle	B3	B4	B5	B6	B7	B8	B9	B10	C3	C4	C5	C6	C7	C8	C9	C10	D3	D4	D5	D6	D7	D8	D9	D10
1	83.7024	95.2942	84.8117	64.6638	138.979	133.329	119.011	125.573	83.3519	72.3285	72.9961	70.8451	63.6372	68.1705	70.4315	63.9369	79.3066	73.0134	71.339	59.0878	110.913	107.512	107.583	115.425
2	71.8166	74.3081	68.5859	48.192	106.479	101.51	89.0299	96.478	62.4128	65.5381	64.7274	54.3937	52.311	58.2964	55.6803	57.059	61.0956	62.2873	63.1359	47.2155	87.75	85.5004	84.235	90.0946
3	56.5234	56.4877	58.4057	37.3195	78.8039	76.5404	68.1986	70.7209	54.0817	56.3005	53.8275	47.4982	47.2672	46.3157	48.5267	50.1791	49.9165	48.0618	50.461	43.968	69.7914	66.0238	65.6714	67.1545
4	42.8372	44.2451	43.3102	26.4476	53.5889	51.4134	49.9319	45.992	39.6507	44.462	42.8369	40.9606	38.3862	40.7543	38.6007	37.5295	42.1977	40.833	41.3114	43.6133	48.3114	54.5836	50.1864	52.6051
5	31.359	35.0133	26.282	20.2834	25.1653	30.5864	26.7753	26.5751	39.0785	32.1757	39.3676	31.7407	30.4267	33.9829	30.2258	32.6632	31.52	31.172	30.5711	28.1787	28.804	31.5324	30.2319	24.5127
6	14.1205	19.0475	17.246	15.4323	4.74819	6.86446	9.0596	5.10381	27.0659	28.7368	27.7444	28.9613	28.7884	27.8267	25.2425	22.7194	19.9471	19.6157	24.3253	16.6201	10.8854	7.96807	13.4689	16.4566
7	8.50776	7.2652	7.08156	3.33905	-14.09	-15.302	-13.5062	-12.9585	17.5929	18.4096	21.8306	21.0702	17.0942	15.7308	16.9212	19.5763	10.7431	8.73214	8.39154	11.7184	-1.37689	-5.49718	-8.79918	-3.69305
8	-8.33563	-7.51677	-6.60832	-1.07671	-30.2468	-33.6462	-27.9737	-26.2359	11.0111	9.42245	13.4947	10.6001	4.53054	10.4569	8.09838	10.186	-0.500264	5.14445	-3.90115	2.76382	-25.935	-21.1598	-23.5101	-23.5948
9	-16.6079	-12.3858	-13.8427	-11.9234	-42.4342	-41.156	-39.1023	-35.3733	1.91629	0.539563	8.59037	6.29567	0.171333	0.449859	3.06088	-2.0579	-6.6962	-9.39675	-4.12529	-4.28395	-37.8061	-36.2575	-30.0424	-35.3594
10	-22.8904	-19.9467	-22.4417	-12.9453	-43.205	-41.8647	-36.5398	-35.7251	-2.99348	-4.03997	-3.79187	-4.21175	-8.43266	-8.46371	-13.2529	-9.90676	-19.6457	-14.7047	-17.9669	-14.1564	-40.6406	-41.0966	-40.2281	-43.0834
11	-21.9839	-33.4406	-27.309	-18.2823	-22.561	-24.0766	-20.0172	-17.6319	-8.78708	-11.8959	-15.8092	-9.30373	-13.8693	-17.0254	-13.9767	-15.392	-23.4606	-24.2748	-24.8176	-20.4811	-40.6897	-43.0323	-40.0148	-40.7776
12	-32.6072	-38.0846	-35.7782	-17.6762	34.1758	32.8543	31.0596	27.2842	-22.507	-18.5691	-24.1834	-17.1042	-20.2918	-24.0344	-22.4962	-25.9657	-27.8675	-30.9257	-29.6678	-30.6573	-21.5824	-20.8013	-22.1299	-22.6677
13	-33.75	-34.1544	-32.6766	-16.4233	147.82	148.848	134.731	133.026	-22.4738	-22.2552	-26.14	-25.8377	-29.6459	-27.8464	-30.5418	-25.0328	-31.5756	-36.365	-33.2808	-33.3635	35.9071	35.4721	30.1908	33.7442
14	-20.787	-27.7158	-21.2407	0.0517986	391.576	381.319	350.067	351.667	-33.0146	-32.0973	-32.8979	-32.6132	-37.8702	-36.4746	-33.107	-34.4627	-30.079	-33.4721	-36.4108	-31.9837	147.235	149.227	148.829	150.438
15	0.787613	0.956467	-0.548649	28.2151	845.952	810	740.956	759.696	-35.4954	-35.2742	-40.7739	-34.3546	-41.4941	-44.0623	-40.1159	-40.5144	-22.0485	-22.1906	-20.3711	-24.5691	378.697	366.286	352.864	371.042
16	43.928	47.4733	47.3359	79.1154	1654.62	1595.59	1459.73	1470.9	-35.4622	-41.6953	-48.8841	-40.102	-37.8965	-46.2186	-42.4804	-40.0018	2.86733	5.20089	-1.17183	-0.966811	803.429	783.82	773.229	794.933
17	123.185	134.262	123.41	163.437	3094.84	2989.54	2725.17	2760.79	-38.0856	-42.5167	-45.8588	-41.0397	-32.052	-29.9159	-31.8831	-30.2609	43.2316	47.0542	48.9764	46.7222	1568.87	1538.59	1524.56	1563.61
18	266.119	276.746	260.991	309.199	5587.59	5396.78	4923.32	4981.67	-30.6381	-34.161	-37.5613	-29.1706	-3.30346	-2.17461	-2.10172	-0.074598	129.127	125.275	130.18	125.494	2957.71	2884.37	2870.58	2943.91
19	497.724	517.71	484.849	553.507	9619.74	9317.72	8500.95	8598.62	-17.0115	-18.3237	-17.8113	-15.1842	49.6513	53.6131	52.608	52.4109	264.618	269.276	278.164	262.262	5351.9	5229.89	5198.37	5328.27
20	880.652	921.357	854.746	943.472	15622.7	15104.1	13891.5	13951.2	12.0261	18.6029	16.9925	12.778	165.862	169.921	163.343	161.605	497.089	498.898	523.642	494.695	9305.72	9098.8	9031.03	9269.9
21	1511.78	1575.12	1457.34	1591.85	22956.6	22284	20731.7	20651.2	66.8073	69.9269	76.0425	61.7246	367.168	388.364	370.808	368.436	880.436	889.428	937.863	875.81	15227	14923.7	14794	15168.2
22	2526.02	2635.34	2437.14	2627.53	29261.3	28483.7	26973.7	26500.4	158.626	158.633	169.159	156.809	760.621	794.603	760.875	749.496	1506.64	1519.62	1604.53	1513	22729.8	22426.2	22124	22708.8
23	4141.4	4331.41	4002.06	4294.2	34211.4	33357.9	31923.5	31096.8	306.273	309.356	330.62	297.675	1466.67	1526.65	1464.92	1444.1	2524.13	2558.16	2703.48	2543.65	29428.2	29339.6	28716	29515.9
24	6690.01	6991.27	6459.51	6885.92	37458.4	36528.6	35197.3	34098.9	559.46	557.128	596.135	547.987	2744.83	2841.26	2735.14	2694.24	4164.07	4219.37	4471.94	4203.2	34787.9	34890.5	33969.6	34955.9
25	10477.5	10941.3	10160.8	10765.4	39448.5	38492.2	37201.9	35963.9	959.064	961.677	1025.83	945.175	4970.75	5141.69	4952	4880.42	6746.31	6842.08	7233.13	6820.32	38377.1	38644.6	37487	38596.4
26	15533.2	16214	15197.7	15990.8	40765.5	39799.6	38514.3	37193.9	1606.25	1612.58	1720.59	1587.69	8692.47	8968.91	8637.52	8522.17	10639.6	10777.6	11365.3	10720	40669.3	40985.6	39677.2	40860.7
27	21026.4	21941.8	20891.4	21726.6	41653.8	40718.2	39416.1	38087.9	2661.18	2672.89	2856.06	2637.88	14384.2	14843.4	14298.6	14135.9	16005.4	16176.1	16956.2	16038.6	42185.2	42510.6	41125.2	42336.2
28	25876.7	27006.4	26016.1	26835.3	42365.1	41408.2	40090.6	38698.3	4337.06	4362.62	4642	4301.94	21865.3	22510.7	21714.2	21525.9	22151.1	22261.5	23097	21938.1	43261.2	43562.7	42144.6	43349.8
29	29683.5	30995.1	30138.9	30886.5	42880.5	41897.4	40598.3	39172.4	6980.47	7004.41	7446.18	6931.51	28842.2	29705.3	28655.9	28516.8	27721.8	27745.9	28577.9	27227.7	44070.3	44338.4	42917.6	44121.5
30	32388.5	33822.9	33100.6	33781	43336.9	42317.1	41004.9	39548.9	10932	10962	11652.6	10863.8	34443.1	35485.1	34214.5	34133.8	32240.9	32179.6	32956.4	31477.3	44703.5	44959.4	43538	44703.1
31	34256	35772.5	35132.7	35779.7	43669.8	42641.8	41320.1	39897.7	16417	16387.2	17325.1	16266.6	38220.2	39375.3	37961.7	37918.1	35511.8	35373	36111.2	34538.8	45233.5	45439.1	44029.2	45171.8
32	35575	37148.8	36557.4	37186.9	43940.7	42937	41572	40151.4	22724	22596.4	23730.8	22508	40595.4	41807.7	40299.6	40277.4	37766.8	37585.3	38312.2	36674.2	45667.8	45849.6	44448.5	45546.7
33	36536	38148.1	37599.1	38196.9	44158.4	43158.9	41787.7	40328.4	28513.5	28246.2	29516.7	28212.2	42144.7	43378.5	41833.6	41811.1	39351.8	39134.4	39874.2	38191.1	46036.2	46161.2	44777.8	45866.6
34	37251.3	38904.3	38375.9	38944.5	44360.9	43361.6	41973.8	40475.3	33288.6	32887.1	34238.7	32914.9	43233.9	44470.6	42898	42885.8	40490.5	40269.9	41021.9	39325.5	46323.9	46436.5	45081.9	46153.6
35	37810.8	39487.6	38980.7	39534.3	44563.3	43533.2	42141.5	40629	36823.6	36292.6	37683.1	36378.2	44030.2	45265.6	43673.4	43675.2	41347.9	41130.6	41925.3	40192.5	46605	46671.9	45318.4	46391.9
36	38247.3	39957.2	39441.1	40007.1	44727.4	43671	42292.3	40763.2	39258.1	38668	40092.5	38800.6	44644	45869.8	44258.4	44272.8	42003.1	41798.4	42635.1	40886.2	46856.2	46867.9	45533.2	46585.5
37	38612.3	40342.8	39828	40402.9	44860.4	43783	42407.6	40888.7	40977.5	40350.2	41792.9	40507.5	45144.4	46355.2	44737.5	44746.5	42540.2	42335.1	43216.5	41447	47106.3	47075.9	45721.1	46752.8
38	38908.8	40648.8	40118.7	40707.2	44954.4	43870.9	42507.5	40978.8	42197.2	41549.1	43038.2	41753.4	45549.2	46744.8	45136.4	45137.4	42967.5	42772.7	43668.4	41917.6	47300.6	47237.1	45886.1	46901.9
39	39157.6	40898	40376.9	40959.1	45023.9	43965.9	42604.5	41067.6	43173.3	42476.8	43989.6	42684	45904.4	47080.2	45477.2	45480.2	43339.9	43139.3	44060.2	42315	47480.9	47393.4	46045.3	47057.9
40	39370.6	41108.9	40609.5	41175.5	45078.6	44059.5	42725.1	41150.4	44017.5	43246.2	44764.9	43438.2	46222.6	47381.1	45769.1	45798.9	43671.1	43454.9	44415.3	42672.5	47655.7	47509	46200.4	47209
	Match template								Mismatch template								Mixed template
	Pro_341F & Pro_805R				ND_F1 & ND_R1				Pro_341F & Pro_805R				ND_F1 & ND_R1				Pro_341F & Pro_805R				ND_F1 & ND_R1
	EMP, Platinum Ultra with EvaGreen

## Sheet: Fig_2 global fitting data
	Fig. 2 global fitting data
		template	primers	replicate	seed	max	KD	max/Kd		average seed	stand. dev.	average max/Kd	stand. dev.
		Match	Pro_341F & Pro_805R	rep 1	0.00124111	183354	10496.2	17.4686		0.0012462	5.17026e-05	17.6465	0.202632
		(BamHI)		rep 2	0.00129692	191770	10945.2	17.5209
				rep 3	0.001164	189976	10788	17.6099
				rep 4	0.00128277	194524	10815.1	17.9863
			ND_F1 & ND_R1	rep 1	0.0554316	162306	16465.9	9.8571		0.0513789	0.00314574	9.82587	0.0268154
				rep 2	0.0533833	158494	16094.6	9.84765
				rep 3	0.0477189	153325	15641.3	9.80257
				rep 4	0.048982	147763	15083.8	9.79614
		Mismatch	Pro_341F & Pro_805R	rep 1	3.85497e-05	211969	12042.3	17.602		3.95392e-05	1.57975e-06	17.6222	0.0652727
		(SpeI)		rep 2	3.90802e-05	208336	11829.1	17.6122
				rep 3	4.22311e-05	216180	12195	17.7269
				rep 4	3.82957e-05	209013	11911.2	17.5476
			ND_F1 & ND_R1	rep 1	0.00036379	157411	18216.6	8.64107		0.000363645	7.15326e-06	8.54577	0.0576578
				rep 2	0.000374678	160400	18890.4	8.49109
				rep 3	0.000361254	155215	18175.9	8.5396
				rep 4	0.000354858	155050	18216.9	8.51133
		Mix 1:1	Pro_341F & Pro_805R	rep 1	0.000595688	203189	11716.2	17.3426		0.000621091	2.41571e-05	17.7245	0.325188
				rep 2	0.000610224	202773	11609	17.4669
				rep 3	0.000660593	209719	11658.5	17.9885
				rep 4	0.000617859	201937	11156.7	18.1001
			ND_F1 & ND_R1	rep 1	0.0266101	177642	16334.7	10.8751		0.0258983	0.000464893	10.378	0.327359
				rep 2	0.0253859	172923	16983.8	10.1816
				rep 3	0.0256044	169654	16236.8	10.4487
				rep 4	0.0259927	170518	17040.6	10.0066

## Sheet: Fig_3 FL data
	Fig_3 data:
	SsoFast, thermal-bias, Nextera tailed primers (TB_F_Tm55_v1 & TB_R_Tm55_v1)
Cycle	B3	B4	B5	B6	B7	B8	B9	B10	B11
1	86.76	87.94	88.83	91.46	87.89	92.24	79.7	88.58	79.11
2	71.68	70.32	71.38	72.75	69.4	78.75	69.64	75.04	70.25
3	51.91	50.16	51.17	51.09	51.59	55.78	56.11	55.15	53.82
4	39.17	41.21	39.18	41.29	39.31	41.63	44.04	42.38	36.03
5	21.38	21.3	21.31	20.84	24.49	24.69	21.55	24.58	23.23
6	7.22	2.8	7.27	6.16	6.97	5.56	7.47	11.41	14.21
7	-7.19	-4.48	-4.12	-5.73	-8.33	-7.1	-2.02	-3.78	-4.31
8	-18.21	-15.03	-19.04	-16.53	-21.73	-20.4	-15.44	-12.96	-12.63
9	-32.16	-27.02	-23.66	-31.86	-28.95	-30.54	-26.56	-31.71	-26.7
10	-38.97	-39.41	-39.61	-40.48	-35.73	-41.86	-37.17	-34.24	-34.75
11	-31.12	-32.16	-33.47	-28.86	-33.25	-41.77	-40.48	-41.67	-42.17
12	-20.61	-20.04	-20.05	-22.69	-22.87	-21.83	-35.31	-36.43	-36.47
13	25.05	23.98	20.7	22.13	25.33	30.26	-13.02	-18.39	-13.71
14	117.54	117.07	121.23	121.26	119.58	126.6	29.05	30.4	29.18
15	296.24	295.34	293.83	303.3	298.67	324.28	129.48	133.88	125.8
16	618.55	633.29	633.15	646.05	640.36	690.11	320.03	339.59	327.06
17	1235.85	1248.6	1255.15	1283.19	1263.54	1367.35	684.16	717.21	687.35
18	2295	2331.43	2340.21	2375.34	2356.57	2541.35	1343.69	1401.71	1352.62
19	4071.36	4133.92	4131.98	4193.32	4166.09	4479.91	2484.63	2608.01	2492.53
20	6753.35	6868.74	6885.08	6950.98	6929.37	7424.03	4387.12	4581.15	4382.45
21	10362.9	10501.1	10519.3	10597.2	10539.5	11286.9	7248.31	7536.94	7216.75
22	14190.1	14339.5	14377.5	14404.1	14337.2	15265.8	10935.3	11394.2	10898.2
23	17566.1	17729.2	17763.7	17741.7	17674.7	18760.7	14668.7	15276.6	14621.6
24	20286	20459	20499.7	20415.5	20363	21560.8	17900.3	18673.3	17840.8
25	22358.7	22521.5	22558.6	22432.9	22404	23671.1	20421.2	21304.5	20350.1
26	23932.8	24107.2	24138.7	23972	23980.3	25297.3	22329.9	23280.3	22227.3
27	25139.9	25302.8	25333.3	25134.9	25159.3	26543.2	23803.5	24764.5	23674.1
28	26086.7	26243.1	26273.5	26065.7	26089.2	27507.9	24965.7	25934.8	24809
29	26828.5	26965.8	27019	26784.2	26788.8	28246.8	25898.2	26854.5	25686.4
30	27399.7	27518.4	27581.3	27316.2	27327.2	28797.6	26616.6	27567.8	26374.2
31	27796.9	27941.4	27993.9	27687.7	27734.3	29230.4	27191	28136.7	26887.4
32	28114.1	28243	28291.5	27979.2	28024.6	29525.1	27612.9	28547.7	27295.5
33	28340	28488.6	28506.5	28200.9	28251.6	29750.6	27940.8	28852.4	27589.4
34	28524.2	28662.4	28648.7	28368.7	28402	29925.7	28174.8	29076.1	27837.2
35	28677.5	28795.4	28771	28485.8	28551.6	30084.8	28366.3	29266.1	28013.4
36	28786	28911.9	28883.9	28610.3	28659.3	30217.6	28513.4	29419.2	28144.9
37	28874.3	29001.3	29016.4	28707.1	28753.7	30283.2	28635.8	29531.7	28231.5
38	28931.1	29086.6	29090.3	28807.4	28820.5	30347.4	28744.2	29636.6	28327.5
39	29008.9	29147.8	29152.5	28876.8	28889	30414.6	28867	29730.9	28417.4
40	29098.6	29221.7	29199.9	28942.2	28946	30517.1	29000	29833.2	28505.1
	Match			Mismatch			Mix

## Sheet: Fig_3 global fitting data
	Fig_3: global fitting data
		template	replicate		seed	max	KD	max/KD		seed average	SD		max/KD average	SD
		Match	1		0.0223097	137337	7508.46	18.291		0.0225752	0.000187745		18.1362	0.130502
			2		0.0227058	137461	7575.34	18.1459
			3		0.0227101	136887	7616.79	17.9717
		Mismatch	1		0.023178	135278	7557.24	17.9005		0.0236814	0.000854338		17.9777	0.055773
			2		0.0229819	135888	7536.69	18.0302
			3		0.0248843	143047	7946.01	18.0024
		Mix	1		0.0124574	137837	7352.41	18.7472		0.0125749	0.00023369		18.1531	0.421356
			2		0.0129012	138893	7795.91	17.8161
			3		0.0123662	133080	7436.33	17.8959

## Sheet: Fig_4 FL data
	Fig_4: Thermal-bias amplification of mixed genome sequencing libraries
	TruSeq tailed primers: (TB_F_Tm55_v2 & TB_R_Tm55_v2)
		Cycle	B3	B4	B5	B6	C3	C4	C5	C6	D3	D4	D5	D6
		1	25.16	36.84	35.5	25.03	33.08	32.18	25.07	22.71	35.73	27.15	34.16	27.15
		2	30.69	37.68	41.17	29.86	35.93	35.39	37.98	33.54	35.64	42.26	33.56	43.96
		3	25.18	24.14	29.11	25.11	27.19	28.88	32.58	27.39	27.84	34.82	32.27	27.8
		4	14.59	23.81	17.52	21.9	22.73	21.62	21.9	21.34	22.58	23.97	22.17	24.68
		5	15.56	15.05	21.82	18.58	15	16.95	14.94	18.45	17.1	19.74	26.97	17.52
		6	3.79	10.23	3.65	6.89	9.34	9.45	9.6	9.07	7.97	7.32	14.06	7.52
		7	-1.91	5.65	-0.54	-1.58	0.24	3.93	3.25	5.18	3.62	2.86	-1.27	0.43
		8	9.87	-3.67	0.42	4.59	1.36	-0.42	-5.1	-3.6	-1.81	-6.62	-4.76	0.58
		9	-0.29	-5.98	0.15	-2.71	-7.03	-8.1	-5.93	-7.05	-6.11	-6.28	-8.25	-0.65
		10	-14.18	-15.79	-9.38	-19.01	-12.49	-9.54	-16.55	-10.31	-16.46	-17.98	-17.52	-13.33
		11	-8.4	-19.11	-18.18	-21.09	-19.3	-19.66	-15.67	-17.06	-14.31	-23.89	-21.3	-15.22
		12	-22.89	-19.83	-29.75	-19.11	-17.58	-26.85	-22.44	-20.96	-22.35	-26.36	-26.45	-30.55
		13	-15.21	-21.73	-15.55	-21.67	-17.97	-21.42	-21.21	-18.55	-20.74	-14.24	-27.48	-24.65
		14	-20.32	-12.5	-15.7	-14.58	-17.14	-19.51	-17.9	-19.62	-19.87	-18.48	-18.41	-20
		15	-1.44	-4.23	-5.81	-5.95	-1.55	-1.36	-2.93	-2.48	-8.96	-4.81	-0.93	-7.13
		16	19.86	19.8	23.61	27.72	21.83	23.88	23.99	19.4	23.76	31.41	20.88	28.36
		17	62.8	72.56	72.35	67.92	69.88	76.64	76.09	76.95	78.84	76.2	91.16	79.7
		18	155.59	154.67	155.93	156.02	157.76	170.11	172.25	166.48	171.81	181.67	186.07	178.01
		19	292.93	304.61	314.08	296.88	309.8	333.94	339.39	331.41	319.39	360.05	385.93	351.79
		20	543.38	567.52	585.8	552.82	567.15	623.72	629.96	618.99	593.55	667	710.72	652.76
		21	967.73	995.67	1041.29	994.48	1013.85	1101.14	1108.51	1100.11	1057.13	1177.85	1253.92	1160.39
		22	1652.72	1717.09	1791.24	1694.87	1730.02	1888.06	1913.54	1895.67	1824.71	2006.52	2146.04	2006.95
		23	2763.63	2862.8	2987.53	2827.87	2892.62	3156.03	3190.93	3159.14	3043.73	3359.14	3594.3	3329.92
		24	4456.22	4636.05	4819.13	4564.84	4675.68	5088.05	5138.68	5092.98	4918.08	5415.43	5762.35	5359
		25	6899.96	7121.93	7411.81	7063.25	7238.72	7822.23	7903.46	7849.07	7557.97	8339.79	8802.56	8224.25
		26	9954.45	10315	10684.6	10222.3	10492.4	11248.9	11358.9	11281.3	10902	11990.2	12528	11754
		27	12960.6	13461.6	13800.4	13319.8	13741.4	14537.8	14651.9	14569.4	14256.3	15544.1	15863.9	15016.9
		28	15279.7	15896.9	16214.1	15723.7	16273.2	17065	17175.2	17086.9	16834.5	18259	18355	17487.3
		29	16816.6	17520.1	17795.5	17302.6	17956.5	18721.4	18822.1	18731.5	18509.9	20036.3	19953.5	19079.8
		30	17858.2	18618.6	18875.6	18351	19079.7	19851.1	19940.5	19845.2	19597.7	21232	21055.8	20162.4
			Library_1 (not spiked)				Library_2 (spiked)				Library_3 (1/2 spiked)

## Sheet: Fig_4 global fitting data
	Fig_4: Mixed genome amplification global fitting data
			replicate	seed	max	KD	max/KD			Average seed	SD	Average max/KD	SD
		Library_1	1	0.000830306	74057.5	6992.26	10.5914			0.000860567	2.78815e-05	10.59	0.151075
			2	0.000860373	78200	7221.69	10.8285
			3	0.000905205	77809.7	7393.97	10.5234
			4	0.000846383	75484.7	7246.4	10.4169
		Library_2	1	0.000862176	79619.6	7465.98	10.6643			0.000936723	4.33039e-05	10.4904	0.127377
			2	0.000957933	81914.4	7763.9	10.5507
			3	0.000969365	81670.3	7840.84	10.416
			4	0.000957418	80963.1	7837.09	10.3308
		Library_3	1	0.000911149	80905.1	7714.39	10.4876			0.00101618	7.17605e-05	10.2353	0.260328
			2	0.00101668	87387.6	8334.6	10.4849
			3	0.00111374	83345.1	8430.16	9.88654
			4	0.00102315	80889.5	8023.17	10.082
